# Primary Vitamin D Target Genes Allow a Categorization of Possible Benefits of Vitamin D<sub>3</sub> Supplementation

Carsten Carlberg<sup>1\*</sup>, Sabine Seuter<sup>1</sup>, Vanessa D. F. de Mello<sup>2</sup>, Ursula Schwab<sup>2,3</sup>, Sari Voutilainen<sup>2</sup>, Kari Pulkki<sup>4</sup>, Tarja Nurmi<sup>5</sup>, Jyrki Virtanen<sup>5</sup>, Tomi-Pekka Tuomainen<sup>5</sup>, Matti Uusitupa<sup>2,6</sup>

**1** School of Medicine, Institute of Biomedicine, University of Eastern Finland, Kuopio, Finland, **2** Institute of Public Health and Clinical Nutrition, Department of Clinical Nutrition, University of Eastern Finland, Kuopio, Finland, **3** Institute of Clinical Medicine, Internal Medicine Kuopio University Hospital, Kuopio, Finland, **4** Eastern Finland Laboratory Centre and Department of Clinical Chemistry, University of Eastern Finland, Kuopio, Finland, **5** Institute of Public Health and Clinical Nutrition, Department of Public Health, University of Eastern Finland, Kuopio, Finland, **6** Research Unit, Kuopio University Hospital, Kuopio, Finland

## Abstract

Vitamin D deficiency has been associated with an increased risk of developing a number of diseases. Here we investigated samples from 71 pre-diabetic individuals of the VitDmet study, a 5-month high dose vitamin D<sub>3</sub> intervention trial during Finnish winter, for their changes in serum 25-hydroxyvitamin D<sub>3</sub> (25(OH)D<sub>3</sub>) concentrations and the expression of primary vitamin D target genes in peripheral blood mononuclear cells and adipose tissue. A negative correlation between serum concentrations of parathyroid hormone and 25(OH)D<sub>3</sub> suggested an overall normal physiological vitamin D response among the participants. The genes *CD14* and thrombomodulin (*THBD*) are up-regulated primary vitamin D targets and showed to be suitable gene expression markers for vitamin D signaling in both primary tissues. However, in a ranking of the samples concerning their expected response to vitamin D only the top half showed a positive correlation between the changes of *CD14* or *THBD* mRNA and serum 25(OH)D<sub>3</sub> concentrations. Interestingly, this categorization allows unmasking a negative correlation between changes in serum concentrations of 25(OH)D<sub>3</sub> and the inflammation marker interleukin 6. We propose the genes *CD14* and *THBD* as transcriptomic biomarkers, from which the effects of a vitamin D<sub>3</sub> supplementation can be evaluated. These biomarkers allow the classification of subjects into those, who might benefit from a vitamin D<sub>3</sub> supplementation, and others who do not.

**Citation:** Carlberg C, Seuter S, de Mello VDF, Schwab U, Voutilainen S, et al. (2013) Primary Vitamin D Target Genes Allow a Categorization of Possible Benefits of Vitamin D<sub>3</sub> Supplementation. PLoS ONE 8(7): e71042. doi:10.1371/journal.pone.0071042

**Editor:** Moray Campbell, Roswell Park Cancer Institute, United States of America

**Received:** May 20, 2013; **Accepted:** June 25, 2013; **Published:** July 29, 2013

**Copyright:** © 2013 Carlberg et al. This is an open-access article distributed under the terms of the Creative Commons Attribution License, which permits unrestricted use, distribution, and reproduction in any medium, provided the original author and source are credited.

**Funding:** This work was supported by the Academy of Finland (grants 118590, 137826 and 131593), Nordforsk for the Sysdiet consortium, the Juselius Foundation, the Juho Vainio Foundation, the Finnish Foundation for Cardiovascular Research and the Finnish Diabetes Research Foundation. The funders had no role in study design, data collection and analysis, decision to publish, or preparation of the manuscript.

**Competing Interests:** The authors have declared that no competing interests exist.

\* E-mail: carsten.carlberg@uef.fi

## Introduction

Vitamin D is a fat-soluble vitamin that can be obtained by diet but is mainly synthesized from 7-dehydrocholesterol in an UV-B-dependent reaction in the skin [1]. In the liver, vitamin D<sub>3</sub> is then further converted into 25-hydroxyvitamin D<sub>3</sub> (25(OH)D<sub>3</sub>), which is the major storage form of vitamin D. In the kidney, 25(OH)D<sub>3</sub> is further 1 $\alpha$ -hydroxylated to yield its hormonal form, 1,25-dihydroxyvitamin D<sub>3</sub> (1,25(OH)<sub>2</sub>D<sub>3</sub>), which acts as a ligand to the transcription factor vitamin D receptor (VDR) [2–4]. Serum 25(OH)D<sub>3</sub> concentration is the widely accepted indicator of the vitamin D status for the human body [5]. Vitamin D deficiency is defined as a serum 25(OH)D<sub>3</sub> concentration of below 50 nM (20 ng/ml) [6] and affects more than 1 billion humans, i.e. it is one of most common health risks [7]. Vitamin D deficiency is caused by the lack of adequate vitamin D in diet and an insufficient exposure to sun [8]. The musculoskeletal consequences of inadequate vitamin D concentrations are well established and include rickets in children and osteomalacia and fractures in adults [9]. A growing number of other diseases, such as type 1 and type 2 diabetes, cardiovascular disease and cancers of the breast, prostate and colon, have also been linked to vitamin D insufficiency, but causal associations have not yet been fully established [10–14]. In

contrast, high vitamin D concentrations can cause overcalcification of bones, soft tissues, heart and kidneys leading to kidney stones and hypertension [15], but these side effects occur only at 25(OH)D<sub>3</sub> concentrations above 240 nM [16].

The classical, physiological role of 1,25(OH)<sub>2</sub>D<sub>3</sub> and its receptor is the regulation of calcium and phosphate homeostasis and bone mineralization [17], but there is also a lot of evidence that VDR ligands have anti-proliferative and immuno-modulatory functions [18,19]. This fits both with the widespread expression of the VDR and the above described consequences of vitamin D deficiency. Transcriptome-wide analysis indicated that per cell type between 200 and 600 genes are primary targets of vitamin D [20–23]. Since most of these genes respond to vitamin D in a cell-specific fashion, the total number of vitamin D targets in the human genome is far higher than 1,000. This is supported by the genome-wide view on VDR binding sites in human lymphoblastoids [20], THP-1 human monocytic leukemia cells [21] and LS180 human colorectal cancer cells [24] obtained by chromatin immunoprecipitation combined with high throughput sequencing (ChIP-seq). These studies reported between 1,600 and 2,800 genomic VDR binding sites that locate both up- and downstream of the transcription start sites of primary vitamin D target genes. However, the three ChIP-seq

datasets overlap only at some 200 genomic locations [25], i.e. there is a limited set of conserved targets of vitamin D and its receptor also on the genomic level.

Sufficient exposure to natural UV-B radiation or adequate intake from diet or supplements is needed to achieve an optimal serum 25(OH)D<sub>3</sub> concentration. However, the change in serum 25(OH)D<sub>3</sub> concentrations can vary widely from person to person. Diet and sun exposure together with age and adiposity in average account only for some 30% of the inter-individual variation in 25(OH)D<sub>3</sub> serum concentrations [26]. Accordingly, genetic and epigenetic factors are responsible for the main variation in vitamin D concentrations [27–29]. Based on this wide inter-individual response variation, it is obvious that a “one-size-fits-all” approach will not work ideally for vitamin D supplementation. Therefore, we investigated in this study samples from 71 pre-diabetic participants of the VitDmet cohort, a 5-month high dose vitamin D<sub>3</sub> intervention trial during Finnish winter [30], for their changes in serum 25(OH)D<sub>3</sub> concentrations and the expression of primary vitamin D target genes in peripheral blood mononuclear cells and adipose tissue. Only the top half of a ranking concerning response to vitamin D provided a significant correlation between the changes of *CD14* or *THBD* mRNA and serum 25(OH)D<sub>3</sub> concentrations. We present *CD14* and *THBD* as transcriptomic biomarkers, from which straightforward conclusions on the benefits of a vitamin D<sub>3</sub> supplementation can be obtained.

## Materials and Methods

### VitDmet study design and ethics statement

Participants donating PBMCs and adipose tissue samples had been participating in the VitDmet study (NCT01479933, ClinicalTrials.gov). They were selected to be ≥60 years of age for males or ≥65 for females, showed evidence of disturbed glucose homeostasis, i.e. impaired fasting glucose or impaired glucose tolerance, but no type 2 diabetes, and had a body mass index (BMI) between 25 and 35. An additional inclusion criterion was a baseline serum 25(OH)D<sub>3</sub> concentration of below 75 nM [30]. The research ethics committee of the Northern Savo Hospital District had approved the study protocol. All participants gave a written informed consent to participate in the study.

### Serum measurements

Serum 25(OH)D<sub>3</sub> concentrations were measured from venous blood samples using a high performance liquid chromatography with coulometric electrode array as described previously [31]. Only a few study participants had a quantifiable serum concentration of 25(OH)D<sub>2</sub>, which is of plant origin; therefore only 25(OH)D<sub>3</sub> was considered. Serum concentrations of PTH were assayed by a chemiluminescence kit (DiaSorin, Dietzenbach, Germany) and those of IL6 by ELISA (Quantikine Kit; R&D Systems, Minneapolis, MN, USA). Serum calcium was determined with colorimetric Arsenazo III test using a Konelab 20XT clinical chemistry analyzer (Thermo Fisher Scientific).

### PBMC isolation, adipose tissue biopsy and sample preparation

Blood samples for PBMC isolation and adipose tissue samples were collected after overnight (12 h) fasting of the study participants. PBMCs were isolated from 8 ml of peripheral blood in a Vacutainer CPT Cell Preparation Tube with sodium citrate (BD, Franklin Lakes, NJ, USA) according to the manufacturer's instructions and stored at –80°C until used for RNA extraction [32]. Adipose tissue (0.5–1 g) was taken by needle biopsy from subcutaneous abdominal adipose tissue under local anesthesia

(10 mg/ml lidocaine without adrenalin). The adipose tissue samples were washed twice with phosphate-buffered saline, frozen quickly in liquid nitrogen and stored at –80°C until used for RNA extraction.

### RNA extraction and cDNA synthesis

Total RNA from PBMCs and adipose tissue samples was extracted using the TRIzol method followed by further purification with miRNeasy Mini Kit columns according to the instructions provided by the manufacturer (Qiagen). The RNA concentration and the A260/A280 ratio were measured using the NanoDrop spectrophotometer, an acceptable ratio being 1.9–2.1 [33]. The total RNA was reverse transcribed into cDNA using the High-Capacity cDNA Archive Kit (Applied Biosystems).

### Quantitative PCR (qPCR)

qPCR reactions were performed using 250 nM of reverse and forward primers, 2 µl cDNA template (25 ng RNA/µl in the cDNA synthesis reaction and then diluted 1/10 prior to the PCR reaction) and the Roche LightCycler 480 SYBRGreen I Master (Roche) in a total volume of 10 µl. In the PCR reaction the hotstart Taq polymerase was activated for 10 min at 95°C, followed by 42 amplification cycles of 20 s denaturation at 95°C, 15 s annealing at primer-specific temperatures (Table S1 in File S1) and 15 s elongation at 72°C and a final elongation for 10 min at 72°C. PCR product specificity was monitored using post-PCR melt curve analysis. Relative expression levels were determined with the comparative delta threshold cycle (delta-Ct) method. Relative expression levels of the target genes were normalized to the internal reference genes *B2M*, *GAPDH* and *HPRT1* (PBMCs) or *GAPDH* and *RPLP0* (adipose tissue) using the geNorm algorithm [34]. Briefly, the arithmetic mean of replicated Ct values for each gene is transformed to a relative quantity (setting the sample with the highest expression as calibrator to 1), using the delta-Ct formula  $Q = E^{\Delta Ct} = E^{(Ct_{\text{calibrator}} - Ct_{\text{sample}})}$  ( $Q$  = quantity sample relative to calibrator sample;  $E$  = amplification efficiency). For normalization, the relative quantities were divided by the normalization factor being the geometric mean of the reference genes.

### Data analysis

Linear regression analysis was performed using StatPlus® software, version 2009 (AnalystSoft, Alexandria, VA, USA). P-values were determined by analysis of variance (ANOVA). The ranking of vitamin D responsiveness was done under the assumption of a linear positive correlation between changes of the mRNA expression of *CD14* or *THBD* and changes in the 25(OH)D<sub>3</sub> serum concentrations. For each tissue and gene the samples were ranked symmetrically to the median of the sorted ratios of gene expression and 25(OH)D<sub>3</sub> serum concentration changes. The mean of these four lists determined the final ranking, taking into account that for 24 participants no adipose tissue samples were available.

## Results

### Characteristics of the VitDmet cohort

With the aim to investigate possible effects of vitamin D<sub>3</sub> supplementation on glucose metabolism and other features of the metabolic syndrome, a three-armed trial (placebo, 40 or 80 µg daily vitamin D<sub>3</sub> supplementation over 5 months) had been designed. The study recruited 73 pre-diabetic (impaired fasting glucose or impaired glucose tolerance) human subjects from the region of Kuopio, Finland (63 °N) [30]. The trial started in

October and finished at the end of winter (April), i.e. in a season of the year where in the Northern hemisphere at this latitude there is no natural UV-B source to induce vitamin D<sub>3</sub> synthesis in the skin of the participants.

In the present study, we focused on a sub-group of 71 participants of the above-described cohort, for which PBMC isolates were available from both the start and the end of the trial. For 47 of these 71 individuals also subcutaneous adipose tissue biopsies had been taken at both time points. The basic clinical and biochemical variables of the participants (Table 1) showed that neither body weight nor BMI changed significantly during the intervention in any of its arms. Importantly, in none of the three groups a significant change in serum calcium concentrations was observed, although one group obtained the rather high dose of 80 µg vitamin D<sub>3</sub>/day. The baseline serum 25(OH)D<sub>3</sub> concentrations of the 71 individuals ranged between 35.9 and 73.6 nM with an average of 58.6 nM (Tables 1 and Table S2 in File S2). During the intervention the 25(OH)D<sub>3</sub> serum concentrations raised in average by 24.9 nM, but only by 1.1 nM in the control group, by 26.7 nM in the group that was supplemented by 40 µg vitamin D<sub>3</sub> per day and by 44.9 nM in the group that received the highest supplementation dose of 80 µg ( $p < 0.001$  across the groups). Accordingly, serum PTH concentrations decreased in the groups with 40 and 80 µg daily vitamin D<sub>3</sub> doses as compared to the placebo group.

The analysis of the individual participants (Table S2 in File S2) showed that the serum 25(OH)D<sub>3</sub> concentrations of 11 persons decreased as much as 30.2 nM, mostly in the placebo group, while 25(OH)D<sub>3</sub> raised in the remaining participants by up to 87.2 nM. Taking the Institute of Medicine's (IoM) recommended 25(OH)D<sub>3</sub> serum concentration of 50 nM as a reference [6], at the start of the trial 14 individuals (19.7%) had been vitamin D deficient, while at its end only 5 persons (7%) had low 25(OH)D<sub>3</sub> concentrations. In contrast, based on the alternatively discussed threshold of 75 nM [35], which was also applied as an inclusion criterion in the present study, at entry all participants (100%) had insufficient vitamin D concentrations, while after the intervention this applied only to 29 persons (40.8%), 18 of which were in the not-supplemented placebo control group. However, the variations in the serum 25(OH)D<sub>3</sub> concentrations were not fully consistent with the

vitamin D<sub>3</sub> supplementation, which in part can be explained by the fact that all participants were allowed to continue their own vitamin D<sub>3</sub> supplementation with a lower dose (up to 20 µg/day). As we found no meaningful correlation of VDR target gene expression between the original study groups, for the following we ignored the information for the type of vitamin D<sub>3</sub> supplementation and took for each of the 71 participants only the relative changes in serum 25(OH)D<sub>3</sub> concentrations into account.

In summary, the gene expression analysis of this study is based on PBMC and adipose tissue samples, which were obtained from a cohort of 71 pre-diabetic elderly participants with a wide range of change in the 25(OH)D<sub>3</sub> serum concentrations after a 5-month vitamin D<sub>3</sub> supplementation during Finnish winter.

### Gene expression characteristics of the study participants

The *PTH* gene is a well-known down-regulated primary target of vitamin D and its receptor, while PTH protein signaling up-regulates *CYP27B1* gene expression [36,37]. This inverse correlation between vitamin D and PTH concentrations is of major importance for appropriate bone mineralization [38]. In this study, we could confirm this inverse correlation, when plotting the relative change of PTH concentrations against the change of the serum 25(OH)D<sub>3</sub> concentrations ( $R^2 = 0.231$ ,  $p = 0.00002$ ; Fig. S1 in File S1). This indicates that the overall vitamin D responsiveness of the 71 participants of the study is according to expectations.

Since the *PTH* gene is exclusively expressed in the parathyroid gland, i.e. in a tissue, which is not easily available for biopsies, it is not an appropriate choice for vitamin D gene expression studies. Therefore, we screened for more globally expressed primary VDR target genes. Our transcriptome- and genome-wide studies in THP-1 monocytes [21,39] suggested the genes *CD14* and *THBD* to be well suited. In contrast to many other primary VDR target genes, *CD14* and *THBD* are known for their prominent, long-lasting response to treatment with 1,25(OH)<sub>2</sub>D<sub>3</sub>. Moreover, both genes are regulated by a strong VDR binding site, which for *CD14* is conserved between VDR ChIP-seq datasets of monocytes and colon cells (Fig. S2A in File S1) and for *THBD* even between monocytes, lymphoblastoids and colon cells (Fig. S2B in File S1). Interestingly, in a very recent study the same two genes were found

**Table 1.** Main clinical and biochemical characteristics of the VitDmet study participants at baseline and their changes during the study.

| Parameter                                | Placebo group*, n = 22** | 40 µg vitamin D <sub>3</sub> /day group, n = 25 | 80 µg vitamin D <sub>3</sub> /day group, n = 24 |
|------------------------------------------|--------------------------|-------------------------------------------------|-------------------------------------------------|
| Serum [25(OH)D <sub>3</sub> ] start (nM) | 58.9+/-10.2              | 59.0+/-7.6                                      | 57.8+/-10.3                                     |
| Delta serum [25(OH)D <sub>3</sub> ] (nM) | 1.1 (-4.7; 6.9)          | 26.7 (20.0; 33.4)                               | 44.8 (36.2; 53.4)                               |
| BMI start (kg/m <sup>2</sup> )           | 30.2+/-2.8               | 28.8+/-2.7                                      | 29.5+/-3.0                                      |
| Delta BMI (kg/m <sup>2</sup> )           | 0.23 (-0.12; 0.58)       | 0.34 (0.13; 0.55)                               | 0.33 (0.07; 0.53)                               |
| Serum [PTH] start (pg/ml)                | 44.6+/-18.2              | 41.5+/-9.5                                      | 43.8+/-11.1                                     |
| Delta serum [PTH] (pg/ml)                | 4.7 (1.4; 8.0)           | -0.5 (-3.5; 2.5)                                | -3.7 (-6.1; -1.3)                               |
| Serum [Ca] start (mM)                    | 2.35+/-0.09              | 2.31+/-0.05                                     | 2.33+/-0.08                                     |
| Delta serum [Ca] (mM)                    | -0.06 (-0.09; -0.03)     | -0.04 (-0.07; -0.01)                            | -0.03 (-0.06; 0.00)                             |
| Age (years)                              | 67.4+/-5.7               | 66.2+/-5.5                                      | 66.4+/-4.3                                      |
| Gender (female/male)                     | 3 (13.6%)/19 (86.4%)     | 4 (16%)/21 (84%)                                | 3 (12%)/21 (88%)                                |

\*all participants were asked to keep their diet and other lifestyle habits unchanged during the study and were allowed to take up to 20 µg vitamin D<sub>3</sub>/day.

\*\*random assignment of the participants to the three groups.

Means and standard deviations for the baseline characteristics before intervention or mean parameter change with 95% confidence interval after the intervention are indicated for the three arms of the study. The detailed data of all 71 study participants are shown in Table S2 in File S2.

doi:10.1371/journal.pone.0071042.t001

in a comparison of a larger number of vitamin D transcriptomics studies (including our own) to be most significantly correlated with serum 25(OH)D<sub>3</sub> concentrations of the Norwegian Women and Cancer Post-genome cohort [40]. Accordingly, we found that the relative mRNA expression of *CD14* and *THBD* in PBMCs (normalized by three housekeeping genes) isolated from the 71 participants at the start of the study correlated highly significantly with the respective expression in cells taken at the end of the intervention ( $R^2 = 0.4123$ ,  $p = 3.13 \cdot 10^{-9}$  and  $R^2 = 0.4185$ ,  $p = 2.56 \cdot 10^{-9}$ ; Figs. 1A and B). This correlation came out to be even better, when the *CD14* and *THBD* mRNA expression levels were further normalized by their respective *VDR* mRNA levels ( $R^2 = 0.6709$ ,  $p = 2.49 \cdot 10^{-11}$  and  $R^2 = 0.7428$ ,  $p = 1.88 \cdot 10^{-15}$ ; Figs. S3A and B in File S1).

For all 71 individuals the change of mRNA expression levels of *CD14* and *THBD* positively correlated to each other ( $R^2 = 0.1479$ ,  $p = 0.00099$ ; Fig. 2A). Interestingly, an even far more significant correlation between the changes of *CD14* and *THBD* mRNA expression levels was observed in adipose tissue samples obtained from 47 of the study participants ( $R^2 = 0.5978$ ,  $p = 3.10^{-10}$ ; Fig. 2B).

Taken together, the expected negative correlation between serum concentrations of PTH and 25(OH)D<sub>3</sub> confirmed an overall normal physiological vitamin D response of the 71 study participants. The primary VDR target genes *CD14* and *THBD* showed to be suitable transcriptomic biomarkers of vitamin D signaling both in PBMCs and adipocytes.

### CD14 and THBD mRNA expression changes efficiently classify study participants

Based on the proven overall functionality of vitamin D signaling in the tissue samples of the study participants we assumed that an increase in serum 25(OH)D<sub>3</sub> concentrations would result in a respective increase in *CD14* and *THBD* mRNA expression. However, neither with all 71 PBMCs donors nor with the subgroup of all 47 adipose tissue donors we could observe any significant correlation between the changes in 25(OH)D<sub>3</sub> serum concentrations and the mRNA expression changes of *CD14* or *THBD* in the respective tissue samples (data not shown). Based on the assumption of a linear positive correlation between the changes of *CD14* or *THBD* gene expression both in PBMCs and adipose tissue and changes of 25(OH)D<sub>3</sub> serum concentrations, we performed four separate rankings of the study participants, which were then combined to one ranking (Table S2 in File S2).

When we took only the top half of the ranking (35 persons), the plot of the changes in *CD14* (Fig. 3A) or *THBD* (Fig. 3B) mRNA expression levels in PBMCs against the respective changes in 25(OH)D<sub>3</sub> concentrations provided statistically significant positive correlations ( $R^2 = 0.168$ ,  $p = 0.01562$  and  $R^2 = 0.243$ ,  $p = 0.00324$ ). We could confirm this observation with the adipose tissue samples, when restricting to the top half of the ranking in this tissue (23 persons). However, in adipose tissue the positive correlation between the changes in *CD14* ( $R^2 = 0.1802$ ,  $p = 0.02163$ ; Fig. 3C) or *THBD* ( $R^2 = 0.1723$ ,  $p = 0.08199$ ; Fig. 3D) mRNA expression levels and their respective 25(OH)D<sub>3</sub> serum concentrations is less significant than in PBMCs. As a negative control for VDR target gene specificity, in neither of the two tissues the changes in *VDR* mRNA expression correlated with 25(OH)D<sub>3</sub> serum concentration changes (data not shown).

The categorization of the study participants by response to a change in their 25(OH)D<sub>3</sub> serum concentrations allows to observe correlations that are not visible when all participants are included in the analyses. For example, on the basis of all 71 participants there is no correlation between the change in serum concentrations of 25(OH)D<sub>3</sub> and the inflammatory marker IL6 [41] (data not shown). However, when we analyzed the segregated set of the 35 most vitamin D responsive samples, we found a significant negative correlation between changes in 25(OH)D<sub>3</sub> and IL6 ( $R^2 = 0.1352$ ,  $p = 0.03$ ; Fig. 4), as described earlier for monocytes [42].

In summary, the changes of *CD14* or *THBD* mRNA expression levels in PBMCs and in adipose tissue samples in relation to 25(OH)D<sub>3</sub> serum concentrations suggest that it is possible to identify subjects who may benefit from vitamin D<sub>3</sub> supplementation, for example manifested by the down-regulation of the inflammatory marker serum IL6.

## Discussion

During the last years a large number of population-based studies initiated a remarkable re-evaluation of the benefits of vitamin D for human health. This had been further catalyzed by the discussion on the recommendation of the IoM concerning the sufficient serum 25(OH)D<sub>3</sub> concentration of 50 nM [6]. Moreover, vitamin D belongs to the few nutritional compounds, which has, via its metabolite 1,25(OH)<sub>2</sub>D<sub>3</sub>, a direct effect on gene regulation [3]. This property allows the discovery and characterization of genomic and transcriptomic biomarkers that enable a direct evaluation of both beneficial and possible unfavorable effects of vitamin D. In the present study, we tested our hypothesis

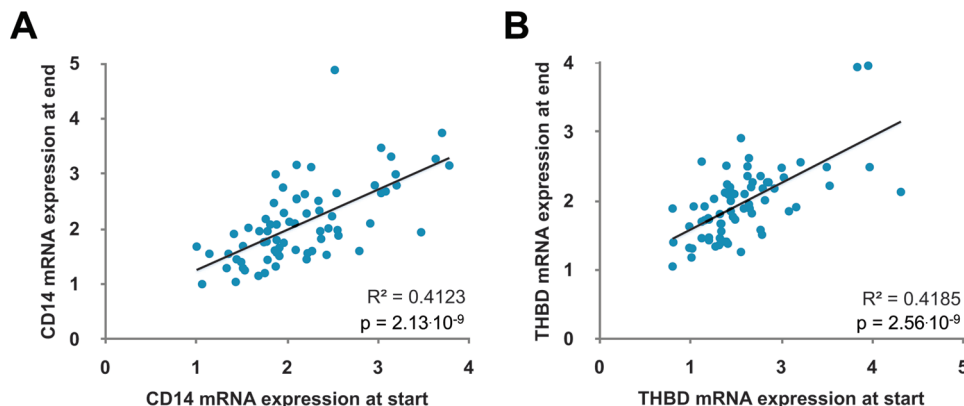

**Figure 1. The genes *CD14* and *THBD* are suitable markers for vitamin D signaling in PBMCs.** For all 71 participants the mRNA expression in PBMCs of the genes *CD14* (A) and *THBD* (B) at the start of the study correlate positively with their expression at the end.  
doi:10.1371/journal.pone.0071042.g001

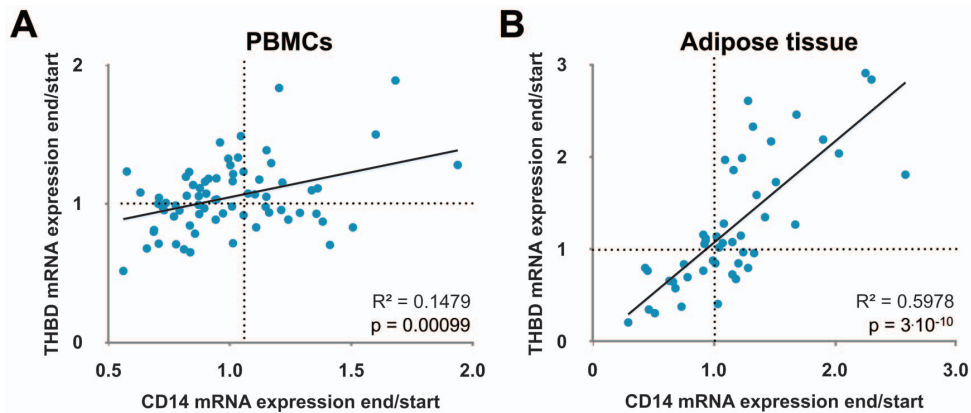

**Figure 2. The genes *CD14* and *THBD* correlate to each other in their expression.** In PBMCs (A) and adipose tissue (B) the ratios of the mRNA expression of *CD14* at the end and the start of the study also positively correlate with the respective ratios of *THBD* mRNA expression.  
 doi:10.1371/journal.pone.0071042.g002

that some primary vitamin D target genes may serve as such biomarkers. We suggest that measuring the change in mRNA expression of the genes *CD14* and *THBD* in response to vitamin D<sub>3</sub> supplementation allows the evaluation of the responsiveness of the vitamin D signaling system of the human individual and provides a guideline if and how to adjust his/her serum vitamin D concentrations.

The PBMC and adipose tissue samples used in this study have the advantage of originating from a rather long vitamin D<sub>3</sub> intervention trial (5 months) with a placebo and a quite high dose of supplementation (up to 80 µg/day, i.e. 3,200 IU). The study was performed in the dark season of the year (Finnish winter) where there is no natural UV-B-induced endogenous production of vitamin D<sub>3</sub>. This design resulted at the end of the study in i) a large range of serum 25(OH)D<sub>3</sub> concentrations between 27.5 and

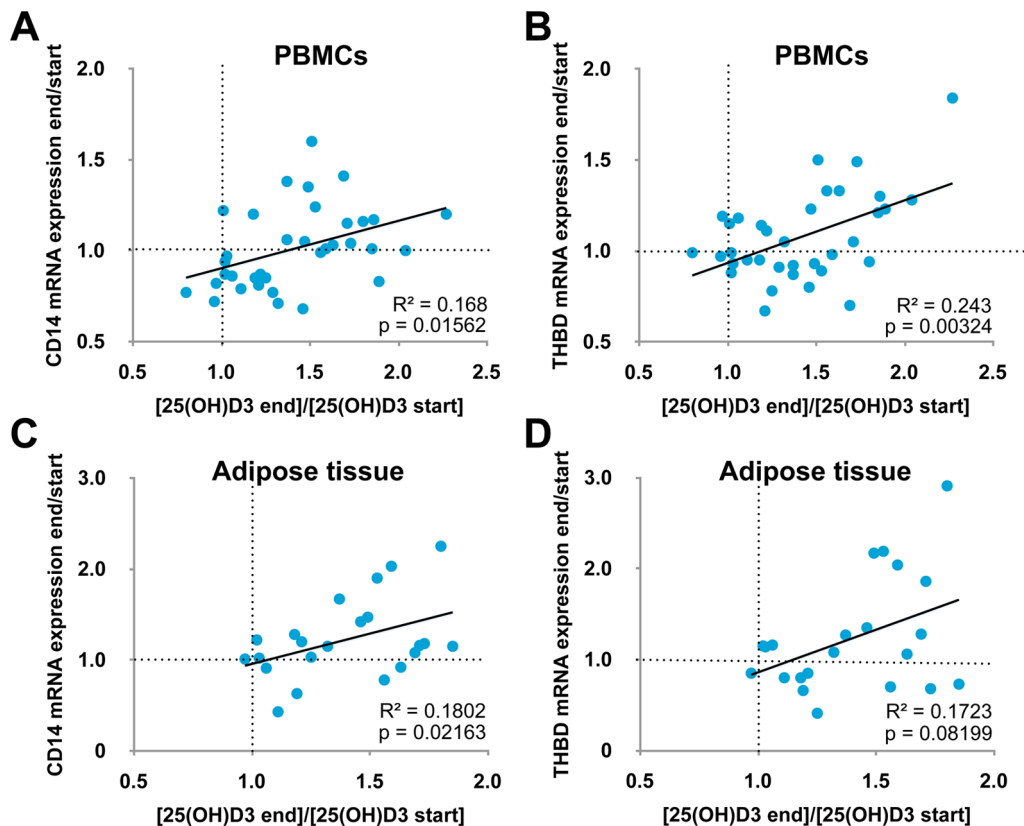

**Figure 3. Changes of 25(OH)D<sub>3</sub> serum concentrations correlate with gene expression in PBMCs and adipocytes.** The study participants were ranked for their changes of *CD14* and *THBD* mRNA expression in PBMCs and adipocytes. For the top half of the PBMC donors (35 individuals, A and B) and also for the top half of the adipose tissue donors (23 individuals, C and D) changes of the mRNA expression of *CD14* (A, C) and *THBD* (B, D) from start to end of the study positively correlate with the respective change of 25(OH)D<sub>3</sub> serum concentrations.  
 doi:10.1371/journal.pone.0071042.g003

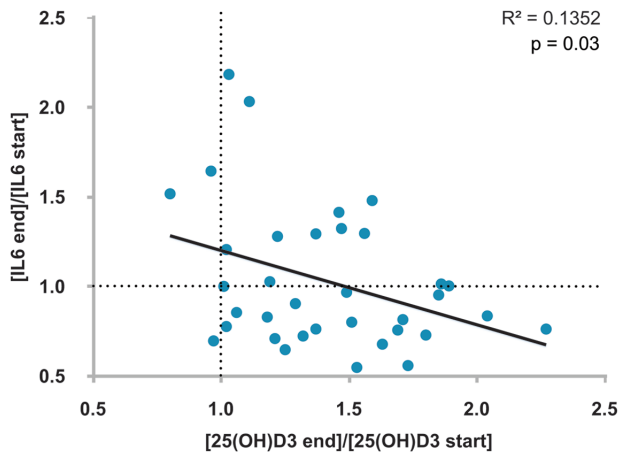

**Figure 4. Negative correlation of serum concentrations for 25(OH)D<sub>3</sub> and IL6 protein.** For the top half of the individuals that were ranked based on their vitamin D responsiveness the ratio of the 25(OH)D<sub>3</sub> serum concentrations at the end and the start of the study is plotted against the respective change of the IL6 protein concentrations. doi:10.1371/journal.pone.0071042.g004

155.7 nM and ii) changes ranging from a decrease by 30.2 nM and an increase by 87.2 nM. In contrast to most other studies reported, we express these changes in relative and not in absolute terms, i.e. as a ratio and not as a difference. Therefore, we interpret the changes in serum 25(OH)D<sub>3</sub> concentrations, which were achieved by the VitDmet study, as a range from a 2.1-fold decrease of the baseline levels up to a 2.8-fold increase. In this way, our approach is closer to the analysis of a typical ligand stimulation experiment as it is the standard in mechanistic studies [39]. Accordingly, the mRNA expression changes range in PBMCs from a 1.8-fold decrease to a 1.9-fold increase for *CD14*, from a 2.0-fold decrease to a 1.9-fold increase for *THBD* and from a 1.8-fold decrease to a 1.9-fold increase for *VDR*. In adipose tissue samples the ranges in mRNA expression changes are even larger spanning from a 3.4-fold decrease to a 2.6-fold increase for *CD14*, from a 4.8-fold decrease to a 2.9-fold increase for *THBD* and from a 4.0-fold decrease to a 4.1-fold increase for *VDR*. Interestingly, although *VDR* expression changes do not correlate with changes in 25(OH)D<sub>3</sub> serum concentrations, the *VDR* gene shows similar ranges of variation than *CD14* and *THBD*.

Although the ranges of the 25(OH)D<sub>3</sub> serum concentration and VDR target gene changes during the intervention are in the same order, there is no statistically significant correlation between them, when all 71 study participants are studied. However, after ranking the study participants by the responsiveness of their *CD14* and *THBD* expression to changes of 25(OH)D<sub>3</sub> concentrations in both tested tissues, we found in the top half of the ranked participants a significant positive correlation. From the latter 35 individuals only 3 showed a slight decrease in 25(OH)D<sub>3</sub> concentrations, i.e. majority of them seem to benefit from the intervention irrespective of their initial serum 25(OH)D<sub>3</sub> concentration. In fact, only 4 of the 35 participants had an initial 25(OH)D<sub>3</sub> concentration of below 50 nM, i.e. according to the recent IoM recommendations [6] most of the participants would not have needed a vitamin D supplementation. For the other half of the study group no relationship between changes in 25(OH)D<sub>3</sub> concentrations and VDR target gene expression could be found. These individuals showed a more individual response to vitamin D supplementation (or the lack of it) and no general conclusion could be reached from gene expression data.

We suggest that analysis of the responsiveness of the genes *CD14* and *THBD* to changes in 25(OH)D<sub>3</sub> serum concentrations allows a categorization of the study participants. Half of the participants can be considered as conventional responders to vitamin D. These individuals have a fully functional vitamin D signaling system and their vitamin D concentrations have not reached saturation. This is proven by the down-regulation of IL6 protein in serum. IL6 has not yet been shown to be a primary VDR target, but it is known as one of the genes, via which the anti-inflammatory effect of vitamin D is mediated [42,43]. IL6 is a marker of low-grade inflammation and has been suggested as a risk factor for type 2 diabetes [44] and cardiovascular disease [45]. Therefore, the down-regulation of IL6 protein in response to raising 25(OH)D<sub>3</sub> serum concentrations is an indication of a beneficial effect of vitamin D<sub>3</sub> supplementation.

The persons in the lower ranking half may have either i) one or the other restriction in their response to vitamin D or ii) a superefficient response to vitamin D, so that they are already saturated with lower levels of circulating vitamin D. The genetic basis for baseline 25(OH)D<sub>3</sub> concentrations are SNPs in genes encoding for vitamin D metabolizing enzymes, such as *CYP2R1* and *CYP24A1*, in the vitamin D-binding protein (encoded by the gene *GC*) and in the *VDR* gene [46,47]. Moreover, the overall efficiency of vitamin D signaling is very likely based on a number of so far largely non-characterized polymorphisms in genomic VDR binding sites [20]. Further studies are needed to stratify individuals as to their susceptibility to vitamin D deficiency. In such studies the individual's response to vitamin D<sub>3</sub> supplementation will be correlated with his/her genomic profile of VDR binding sites.

In a very recent report the gene expression patterns of eight healthy adults were followed, which had been supplemented daily with either 10 or 40 µg vitamin D<sub>3</sub> in the Boston area (42 °N) for 2 months during winter time [23]. It describes close to 300 genes to be more than 1.5-fold changed in expression and the genes *CD83*, *TNFAIP3*, *KLF10* and *SBDS* were selected as most representative markers. We found that only the *KLF10* gene shows in colon cancer cells a genomic VDR binding site, i.e. there is not much evidence that these four markers genes are primary VDR targets with a global expression profile as reported here for *CD14* and *THBD*. Therefore, the expression changes of the four described genes probably cannot be used for a similar type of categorization as performed in this study with *CD14* and *THBD*.

In conclusion, we suggest that the genes *CD14* and *THBD* are suitable biomarkers for displaying the transcriptomic response of human tissues to vitamin D<sub>3</sub> supplementation. However, only half of all investigated persons seem to respond in a way that we expected based on principles of vitamin D gene regulation to changes in their serum 25(OH)D<sub>3</sub> concentrations, granting that from the response of their *CD14* and *THBD* mRNA expressions straightforward conclusions on the benefits of a vitamin D<sub>3</sub> supplementation can be obtained. This suggests a categorization of the study participants into those that are regular responders to vitamin D and others with an irregular response. The latter persons may have either some variation in their vitamin D signaling, which make more complex investigations necessary, or they simply have a sufficient vitamin D concentration, so that further supplementation is unnecessary.

## Supporting Information

**File S1**  
(PDF)

**File S2**  
(XLSX)

## Acknowledgments

The authors thank Annikki Kontinen, Pirkko Kanerva, Päivi Turunen, Erja Kinnunen, Tuomas Onnukka and Kaija Kettunen for technical assistance, Mieke Verstuyf for discussions and Sami Heikkinen for statistical advice.

## References

- Holick MF, Frommer JE, McNeill SC, Richtand NM, Henley JW, et al. (1977) Photometabolism of 7-dehydrocholesterol to previtamin D<sub>3</sub> in skin. *Biochem Biophys Res Commun* 76: 107–114.
- Haussler MR, Jurutka PW, Mizwicki M, Norman AW (2011) Vitamin D receptor (VDR)-mediated actions of 1 $\alpha$ ,25(OH)<sub>2</sub>vitamin D<sub>3</sub>: genomic and non-genomic mechanisms. *Best Pract Res Clin Endocrinol Metab* 25: 543–559.
- Carlberg C, Campbell MJ (2013) Vitamin D receptor signaling mechanisms: Integrated actions of a well-defined transcription factor. *Steroids* 78: 127–136.
- Carlberg C, Molnár F (2012) Current status of vitamin D signaling and its therapeutic applications. *Curr Top Med Chem* 12: 528–547.
- Hollis BW (2005) Circulating 25-hydroxyvitamin D levels indicative of vitamin D sufficiency: implications for establishing a new effective dietary intake recommendation for vitamin D. *J Nutr* 135: 317–322.
- Institute-of-Medicine (2011) Dietary reference intakes for calcium and vitamin D. Washington, DC: National Academies Press.
- Holick MF (2007) Vitamin D deficiency. *N Engl J Med* 357: 266–281.
- Holick MF (2011) Vitamin D deficiency in 2010: health benefits of vitamin D and sunlight: a D-bate. *Nat Rev Endocrinol* 7: 73–75.
- Bouillon R, Carmeliet G, Verlinden L, van Etten E, Verstuyf A, et al. (2008) Vitamin D and human health: lessons from vitamin D receptor null mice. *Endocr Rev* 29: 726–776.
- Hyppönen E, Laara E, Reunanen A, Jarvelin MR, Virtanen SM (2001) Intake of vitamin D and risk of type 1 diabetes: a birth-cohort study. *Lancet* 358: 1500–1503.
- Wang TJ, Pencina MJ, Booth SL, Jacques PF, Ingelsson E, et al. (2008) Vitamin D deficiency and risk of cardiovascular disease. *Circulation* 117: 503–511.
- Giovannucci E, Liu Y, Hollis BW, Rimm EB (2008) 25-hydroxyvitamin D and risk of myocardial infarction in men: a prospective study. *Arch Intern Med* 168: 1174–1180.
- Rosen CJ, Adams JS, Bikle DD, Black DM, Demay MB, et al. (2012) The nonskeletal effects of vitamin D: an Endocrine Society scientific statement. *Endocr Rev* 33: 456–492.
- Garland CF, Gorham ED, Mohr SB, Garland FC (2009) Vitamin D for cancer prevention: global perspective. *Ann Epidemiol* 19: 468–483.
- Pandita KK, Razdan S, Kudryar RP, Beigh A, Kuchay S, et al. (2012) "Excess good can be Dangerous". A case series of iatrogenic symptomatic hypercalcemia due to hypervitaminosis D. *Clin Cases Miner Bone Metab* 9: 118–120.
- Bischoff-Ferrari HA, Shao A, Dawson-Hughes B, Hathcock J, Giovannucci E, et al. (2010) Benefit-risk assessment of vitamin D supplementation. *Osteoporos Int* 21: 1121–1132.
- DeLuca HF (2004) Overview of general physiologic features and functions of vitamin D. *Am J Clin Nutr* 80: 1689S–1696S.
- Ingraham BA, Bragdon B, Nohe A (2008) Molecular basis of the potential of vitamin D to prevent cancer. *Curr Med Res Opin* 24: 139–149.
- Verstuyf A, Carmeliet G, Bouillon R, Mathieu C (2010) Vitamin D: a pleiotropic hormone. *Kidney Int* 78: 140–145.
- Ramagopalan SV, Heger A, Berlanga AJ, Maugeri NJ, Lincoln MR, et al. (2010) A ChIP-seq defined genome-wide map of vitamin D receptor binding: associations with disease and evolution. *Genome Res* 20: 1352–1360.
- Heikkinen S, Väisänen S, Pehkonen P, Seuter S, Benes V, et al. (2011) Nuclear hormone 1 $\alpha$ ,25-dihydroxyvitamin D<sub>3</sub> elicits a genome-wide shift in the locations of VDR chromatin occupancy. *Nucleic Acids Res* 39: 9181–9193.
- Kovalenko PL, Zhang Z, Cui M, Clinton SK, Fleet JC (2010) 1,25 dihydroxyvitamin D-mediated orchestration of anticancer, transcript-level effects in the immortalized, non-transformed prostate epithelial cell line, RWPE1. *BMC Genomics* 11: 26.
- Hosseini-Nezhad A, Spira A, Holick MF (2013) Influence of vitamin D status and vitamin D<sub>3</sub> supplementation on genome wide expression of white blood cells: a randomized double-blind clinical trial. *PLoS One* 8: e58725.
- Meyer MB, Goetsch PD, Pike JW (2012) VDR/RXR and TCF4/ $\beta$ -catenin cistromes in colonic cells of colorectal tumor origin: impact on c-FOS and c-MYC gene expression. *Mol Endocrinol* 26: 37–51.
- Carlberg C, Seuter S, Heikkinen S (2012) The first genome-wide view of vitamin D receptor locations and their mechanistic implications. *Anticancer Res* 32: 271–282.
- Engelman CD, Meyers KJ, Iyengar SK, Liu Z, Karki CK, et al. (2013) Vitamin D intake and season modify the effects of the GC and CYP2R1 genes on 25-hydroxyvitamin D concentrations. *J Nutr* 143: 17–26.

## Author Contributions

Conceived and designed the experiments: MU TPT JV SV CC. Performed the experiments: SS KP. Analyzed the data: CC SS. Wrote the paper: CC. Responsible for the dietary part of study management and implementation: SV JV. Involved in the study methodology management and implementation: US VdM KP TN.

- Engelman CD, Fingerlin TE, Langefeld CD, Hicks PJ, Rich SS, et al. (2008) Genetic and environmental determinants of 25-hydroxyvitamin D and 1,25-dihydroxyvitamin D levels in Hispanic and African Americans. *J Clin Endocrinol Metab* 93: 3381–3388.
- Orton SM, Morris AP, Herrera BM, Ramagopalan SV, Lincoln MR, et al. (2008) Evidence for genetic regulation of vitamin D status in twins with multiple sclerosis. *Am J Clin Nutr* 88: 441–447.
- Snellman G, Melhus H, Gedeberg R, Olofsson S, Wolk A, et al. (2009) Seasonal genetic influence on serum 25-hydroxyvitamin D levels: a twin study. *PLoS One* 4: e7747.
- Tuomainen TP, Voutilainen S, Virtanen J, Nurmi T, Mursu J, et al. (2013) Glucose metabolism effects of vitamin D supplementation in prediabetes – the VitDmet study. submitted.
- Nurmi T, Tuomainen TP, Virtanen J, Mursu J, Voutilainen S (2013) High-performance liquid chromatography and coulometric electrode array detector in serum 25-hydroxyvitamin D<sub>3</sub> and 25-hydroxyvitamin D<sub>2</sub> analyses. *Anal Biochem* 435: 1–9.
- de Mello VD, Erkkilä AT, Schwab US, Pulkkinen L, Kolehmainen M, et al. (2009) The effect of fatty or lean fish intake on inflammatory gene expression in peripheral blood mononuclear cells of patients with coronary heart disease. *Eur J Nutr* 48: 447–455.
- Kolehmainen M, Salopuro T, Schwab US, Kekalainen J, Kallio P, et al. (2008) Weight reduction modulates expression of genes involved in extracellular matrix and cell death: the GENOBIN study. *Int J Obes* 32: 292–303.
- Vandesompele J, De Preter K, Pattyn F, Poppe B, Van Roy N, et al. (2002) Accurate normalization of real-time quantitative RT-PCR data by geometric averaging of multiple internal control genes. *Genome Biol* 3: R34.
- Vieth R (2011) Why the minimum desirable serum 25-hydroxyvitamin D level should be 75 nmol/L (30 ng/ml). *Best Pract Res Clin Endocrinol Metab* 25: 681–691.
- Mackey SL, Heymont JL, Kronenberg HM, Demay MB (1996) Vitamin D receptor binding to the negative human parathyroid hormone response element does not require the retinoid X receptor. *Mol Endocrinol* 10: 298–305.
- Liu SM, Koszewski N, Lupez M, Malluche HH, Olivera A, et al. (1996) Characterization of a response element in the 5'-flanking region of the avian (chicken) PTH gene that mediates negative regulation of gene transcription by 1,25-dihydroxyvitamin D<sub>3</sub> and binds the vitamin D<sub>3</sub> receptor. *Mol Endocrinol* 10: 206–215.
- Outila TA, Kärkkäinen MUM, Lamberg-Allardt CJE (2001) Vitamin D status affects serum parathyroid hormone concentrations during winter in female adolescents: associations with forearm bone mineral density. *Am J Clin Nutr* 74: 206–210.
- Seuter S, Heikkinen S, Carlberg C (2013) Chromatin acetylation at transcription start sites and vitamin D receptor binding regions relates to effects of 1 $\alpha$ ,25-dihydroxyvitamin D<sub>3</sub> and histone deacetylase inhibitors on gene expression. *Nucleic Acids Res* 41: 110–124.
- Standahl Olsen K, Rylander C, Brustad M, Aksnes L, Lund E (2013) Plasma 25 hydroxyvitamin D level and blood gene expression profiles: a cross-sectional study of the Norwegian Women and Cancer Post-genome Cohort. *Eur J Clin Nutr*. in press.
- McGeough MD, Pena CA, Mueller JL, Pociask DA, Broderick L, et al. (2012) Cutting edge: IL-6 is a marker of inflammation with no direct role in inflammasome-mediated mouse models. *J Immunol* 189: 2707–2711.
- Zhang Y, Leung DY, Richers BN, Liu Y, Remigio LK, et al. (2012) Vitamin D inhibits monocyte/macrophage proinflammatory cytokine production by targeting MAPK phosphatase-1. *J Immunol* 188: 2127–2135.
- Slattery ML, Wolff RK, Herrick JS, Caan BJ, Potter JD (2007) IL6 genotypes and colon and rectal cancer. *Cancer Causes Control* 18: 1095–1105.
- Kristiansen OP, Mandrup-Poulsen T (2005) Interleukin-6 and diabetes: the good, the bad, or the indifferent? *Diabetes* 54 Suppl 2: S114–124.
- Sarwar N, Butterworth AS, Freitag DF, Gregson J, Willett P, et al. (2012) Interleukin-6 receptor pathways in coronary heart disease: a collaborative meta-analysis of 82 studies. *Lancet* 379: 1205–1213.
- Wang TJ, Zhang F, Richards JB, Kestenbaum B, van Meurs JB, et al. (2010) Common genetic determinants of vitamin D insufficiency: a genome-wide association study. *Lancet* 376: 180–188.
- Dastani Z, Li R, Richards B (2013) Genetic regulation of vitamin D levels. *Calcif Tissue Int* 92: 106–117.
