# Supplementary material for: Primary Vitamin D Target Genes Allow a Categorization of Possible Benefits of Vitamin D3 Supplementation
Source: PLOS journal article supplement (doi:10.1371/journal.pone.0071042), 2013-07-29

## SUPPLEMENTARY MATERIAL

## SUPPLEMENTARY TABLES

Table S1: qPCR primers.

| Gene         | Fragment size<br>(bp) | Annealing<br>temperature (°C) | Primer sequences (5'-3')                         |
|--------------|-----------------------|-------------------------------|--------------------------------------------------|
| <i>B2M</i>   | 246                   | 60                            | GGCTATCCAGCGTACTCCAAA<br>CGGCAGGCATACTCATCTTTTT  |
| <i>CD14</i>  | 142                   | 60                            | ACGCCAGAACCTTGTGAGC<br>GCATGGATCTCCACCTCTACTG    |
| <i>GAPDH</i> | 113                   | 60                            | CATGAGAAGTATGACAACAGCC<br>AGTCCTTCCACGATACCAAAGT |
| <i>HPRT1</i> | 94                    | 60                            | TGACACTGGCAAAACAATGCA<br>GGTCCTTTTCACCAGCAAGCT   |
| <i>RPLP0</i> | 318                   | 60                            | AGATGCAGCAGATCCGCAT<br>GTGGTGATACCTAAAGCCTG      |
| <i>THBD</i>  | 107                   | 60                            | GACCTTCCTCAATGCCAGTCA<br>CGTCGCCGTTTCAGTAGCAA    |
| <i>VDR</i>   | 332                   | 60                            | AGATGACCCTTCTGTGACCC<br>AGCTTCTTCAGTCCCACCTG     |

**Table S2: Ranking of vitamin D response.** Complete data set for 71 participants that donated PBMCs. From 47 of them also adipose tissue biopsies were taken. Ranking is based on response of both tissues to vitamin D.

### SUPPLEMENTARY FIGURE LEGENDS

**Figure S1: Negative correlation of serum concentrations for 25(OH)D<sub>3</sub> and PTH protein.** For all 71 participants the ratio of the 25(OH)D<sub>3</sub> concentration at the end and the start of the study is plotted against the respective change of the PTH serum concentrations.

**Figure S2: VDR binding regions of the genes *CD14* and *THBD*.** VDR ChIP-seq data for the genomic loci of the genes *CD14* (A) and *THBD* (B) are shown. The peak tracks show data from LS-180 colon carcinoma cells (pink [24]), lymphoblastoids (light blue [20]) and THP-1 monocytes (red [21]) comparing genomic VDR binding in unstimulated or vehicle-stimulated cells with that after 1,25(OH)<sub>2</sub>D<sub>3</sub> (1,25D) treatment for indicated times. The structure of the genes is shown in blue and the respective VDR peaks are boxed.

**Figure S3: *CD14* and *THBD* expression levels normalized by VDR expression.** The mRNA expression of the genes *CD14* (A) and *THBD* (B) in PBMCs at the end and the start of the study correlate even better, when it is normalized by mRNA expression.

**Fig. S1**

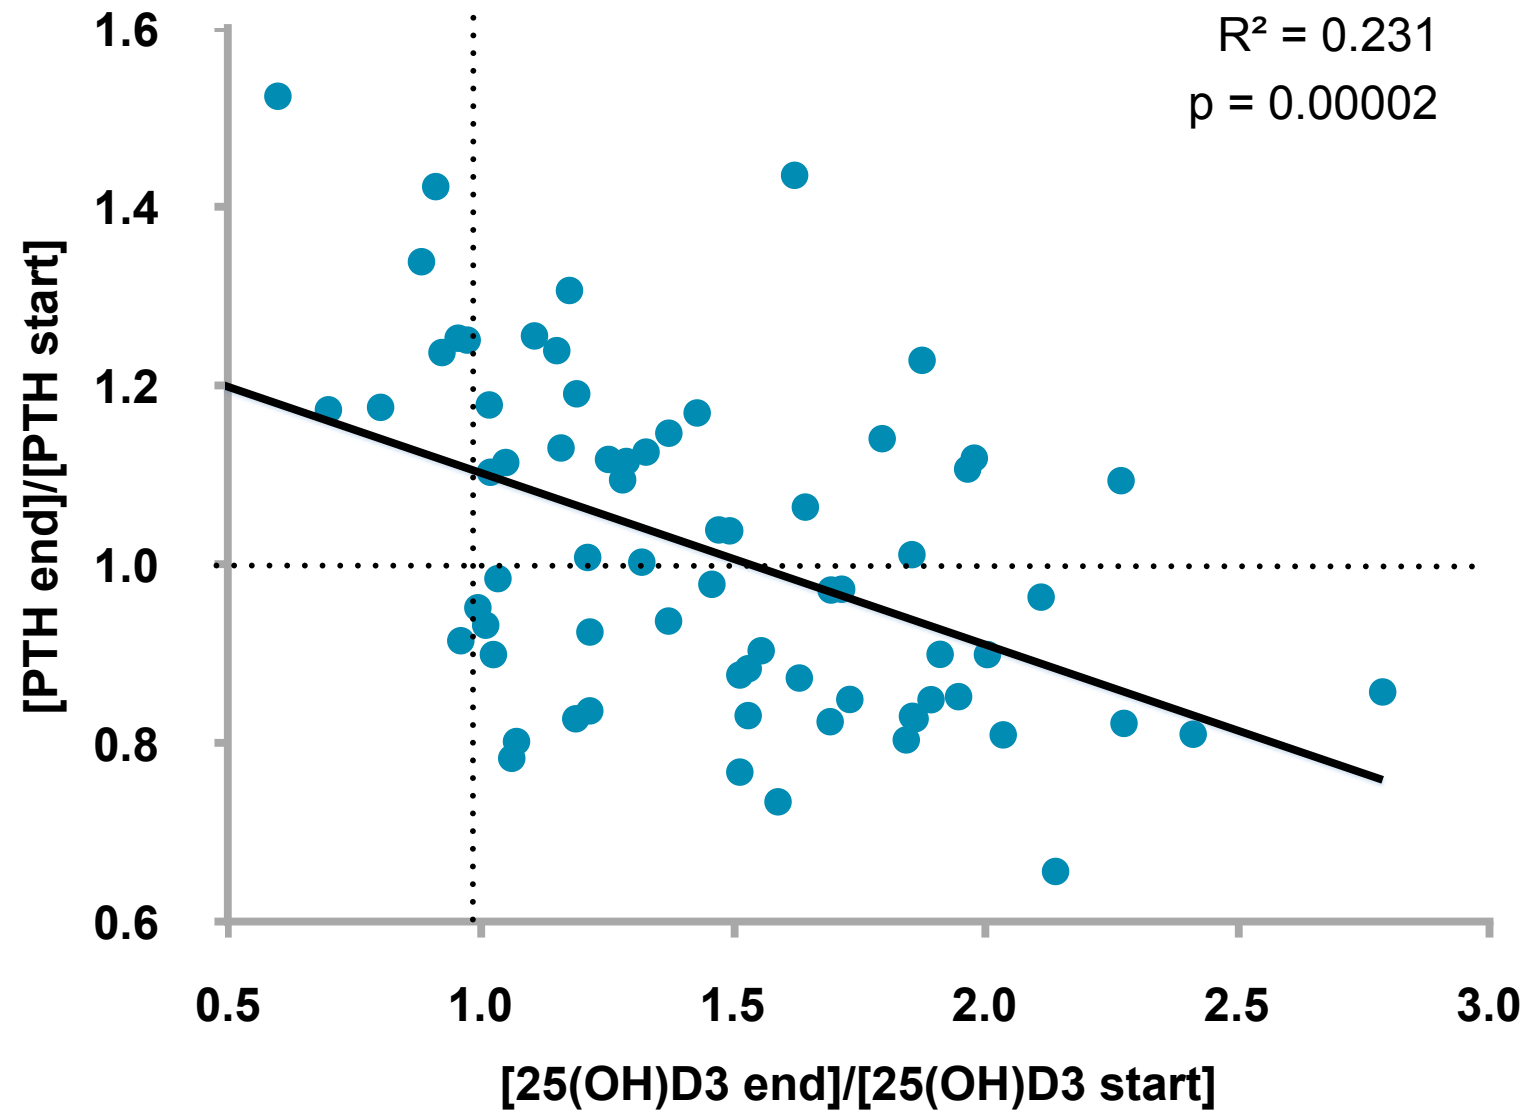

**Fig. S2**

**A**

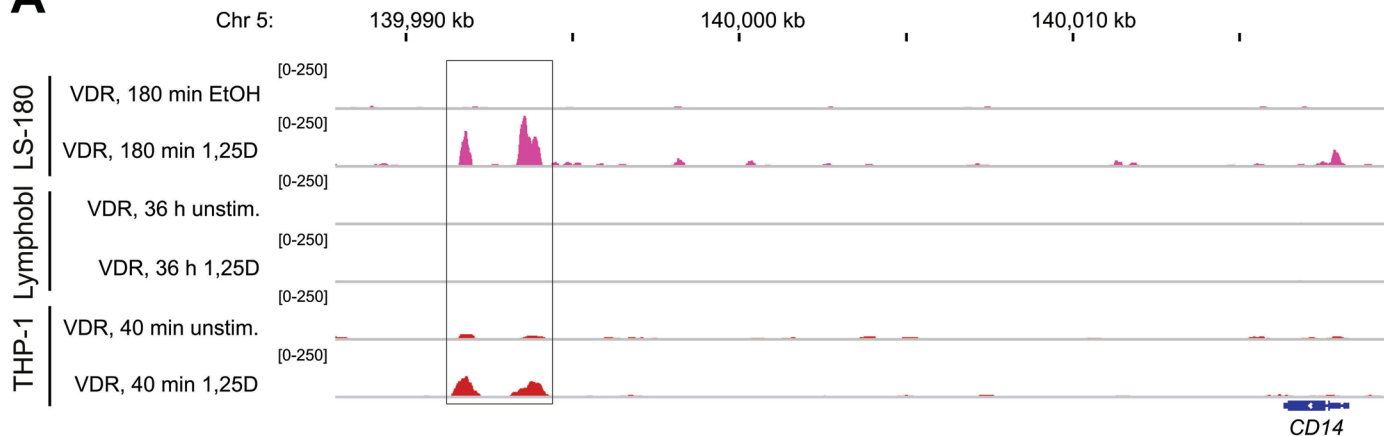

**B**

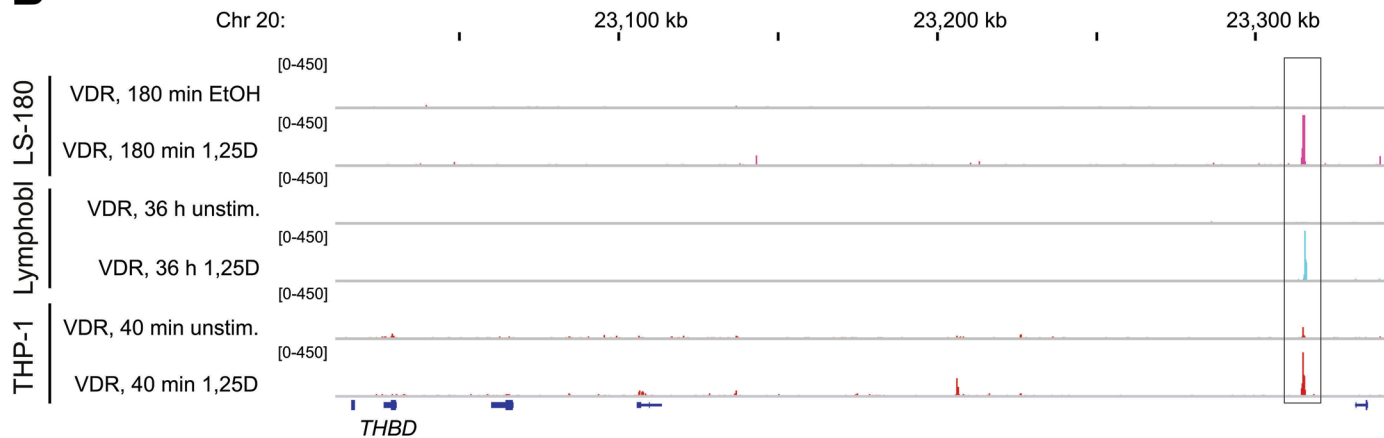

**Fig. S3**

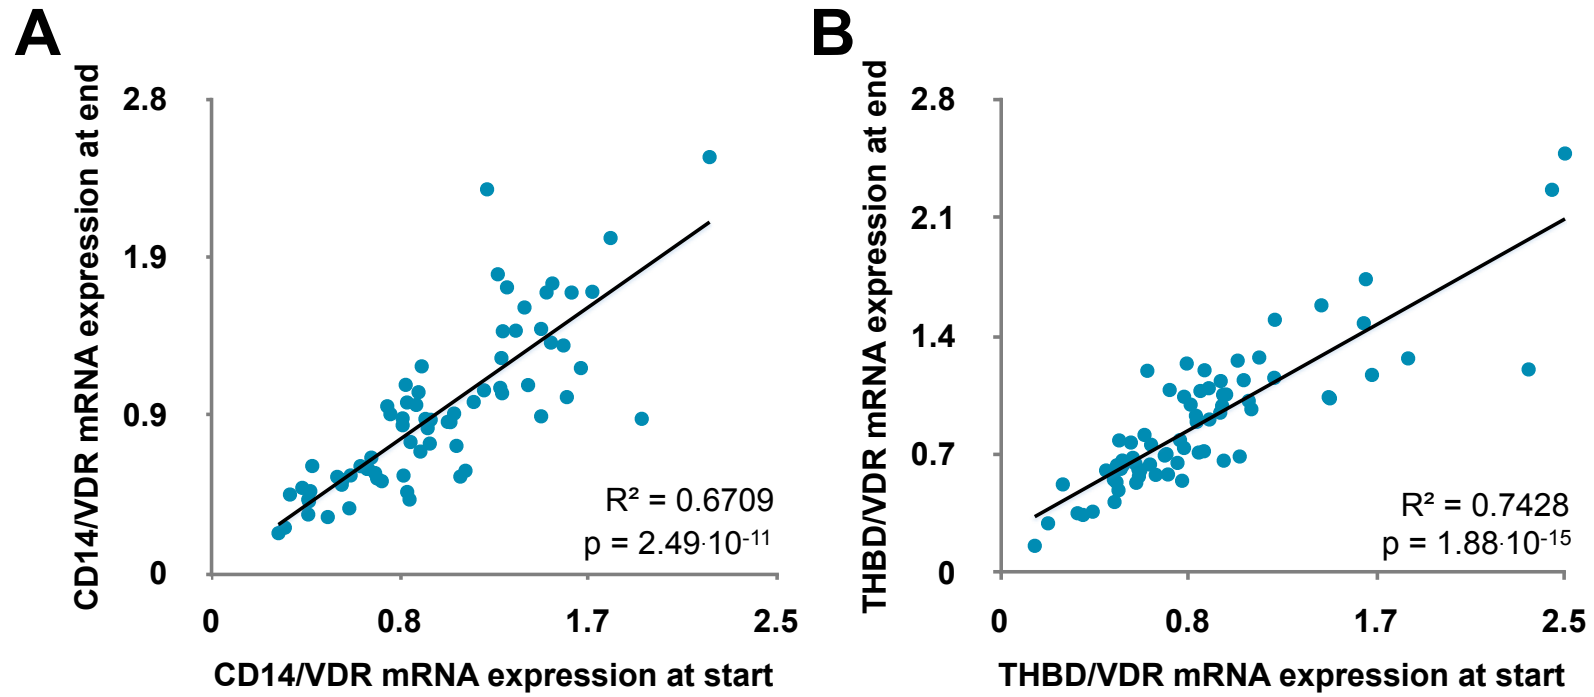

Supplement: S1 (10.1371/journal.pone.0071042.s001) [file journal.pone.0071042.s001]
