# Supplementary material for: Primary Vitamin D Target Genes Allow a Categorization of Possible Benefits of Vitamin D3 Supplementation
Source: PLoS One. 2013 Jul 29;8(7):e71042. doi: 10.1371/journal.pone.0071042 (PMC3726591; doi:10.1371/journal.pone.0071042)
Supplement: File S2 — (XLSX) [file pone.0071042.s002.xlsx]

## Sheet: Sheet1
Subject No	Type of invervention (µg vitamin D3/day)*	Age	Gender	BMI in kg/m2 at start	BMI in kg/m2 at end	[25(OH)D3] in nM at start	[25(OH)D3] in nM at end	fold change [25(OH)D3]	serum PTH protein in pg/ml at start	serum PTH protein in pg/ml at end	fold change serum PTH protein	serum calcium in mM at start	serum calcium in mM at end	fold change serum calcium	serum IL6 protein expression in pM at start	serum IL6 protein expression in pM at end	fold change serum IL6 protein expression	relative CD14 mRNA expression in PBMCs at start	relative CD14 mRNA expression in PBMCs at end	fold change CD14 mRNA expression in PBMCs	relative CD14 mRNA expression in adipocytes at start	relative CD14 mRNA expression in adipocytes at end	fold change CD14 mRNA expression in adipocytes	relative THBD mRNA expression in PBMCs at start	relative THBD mRNA expression in PBMCs at end	fold change THBD mRNA expression in PBMCs	relative THBD mRNA expression in adipocytes at start	relative THBD mRNA expression in adipocytes at end	fold change THBD mRNA expression in adipocytes	relative VDR mRNA expression in PBMCs at start	relative VDR mRNA expression in PBMCs at end	fold change VDR mRNA expression in PBMCs	relative VDR mRNA expression in adipocytes at start	relative VDR mRNA expression in adipocytes at end	fold change VDR mRNA expression in adipocytes	Rank in response to vitamin D
64	80	62.32	male	28.7654	29.8302	69.76	91.98	1.31852	29.3	29.4	1.00341	2.38	2.27	0.953782	3.99	4	1.00251	1.86607	1.3246	0.709835	2.08	2.4	1.15	1.39797	1.46296	1.04649	1.66	1.8	1.08	4.30032	2.71948	0.632391	3.48	4.03	1.16	1
100	0	70.72	male	31.1209	31.3468	37.84	51.92	1.37209	35.2	40.4	1.14773	2.35	2.25	0.957447	1.57	1.19	0.757962	2.01857	2.13366	1.05702	3.28	5.49	1.67	2.06098	1.88775	0.915945	2.47	3.14	1.27	1.19564	1.28145	1.07177	3.16	7.2	2.28	2
63	40	64.51	male	35.8383	36.0332	53.98	92.56	1.71471	63.3	61.6	0.973144	2.32	2.38	1.02586	0.97	0.79	0.814433	1.34827	1.54518	1.14605	3.96	4.6	1.16	1.00309	1.05053	1.04729	2.26	4.2	1.86	4.59126	6.53818	1.42405	8.67	22.01	2.54	3
76	40	61.57	male	24.6643	26.1816	51.38	83.79	1.63079	39.6	34.6	0.873737	2.27	2.36	1.03965	1.88	1.57	0.835106	2.21231	2.27802	1.0297	2.11	1.95	0.92	1.44282	1.91558	1.32766	1.16	1.23	1.06	2.62079	2.48898	0.949708	1.95	2.14	1.1	4
90	0	63.16	male	30.9972	32.0503	47.88	57.99	1.21115	46.1	46.5	1.00868	2.43	2.38	0.979424	0.93	0.62	0.666667	1.77632	1.43949	0.810378	2.01	2.42	1.2	3.71207	2.48898	0.670511	2.23	1.9	0.85	2.93494	3.74942	1.27751	4.82	4.27	0.89	5
78	0	61.48	male	26.3413	26.2788	68.47	85.76	1.25252	49	54.8	1.11837	2.45	2.39	0.97551	1.74	0.87	0.5	1.51338	1.28639	0.850012	2.07	2.14	1.03	1.75862	1.37872	0.78398	3.36	1.38	0.41	2.00772	2.36927	1.18008	2.87	2.62	0.91	6
99	40	67.27	male	30.8304	32.4394	62.92	97.85	1.55515	28.2	25.5	0.904255	2.26	2.29	1.01327	1.27	0.86	0.677165	2.34567	2.32947	0.993092	2.58	2.02	0.78	1.2283	1.62826	1.32562	2.56	1.78	0.7	1.55593	1.36394	0.876606	4.43	1.09	0.25	7
37	40	67.64	male	28.0268	29.0367	69.71	77.08	1.10572	45.6	57.3	1.25658	2.38	2.27	0.953782	0.53	0.58	1.09434	1.90968	1.51455	0.793089	2.99	1.28	0.43	2.05148	1.95282	0.951905	1.76	1.41	0.8	1.81224	1.68568	0.930163	5.58	5.59	1	8
73	80	70.62	male	31.3035	31.4755	70.05	121.25	1.73091	42.6	36.2	0.849765	2.21	2.25	1.0181	0.84	0.64	0.761905	2.54324	2.65124	1.04247	2.21	2.6	1.18	1.29235	1.92297	1.48796	3.47	2.35	0.68	2.10591	2.45283	1.16473	7.84	2	0.26	9
50	80	65.98	male	27.2423	28.2466	63.22	100.43	1.58858	42.3	31.1	0.735225	2.25	2.39	1.06222	2.14	1.63	0.761682	1.43949	1.45285	1.00928	1	2.03	2.03	1.49715	1.46973	0.981686	1.89	3.85	2.04	1.37554	1.62076	1.17827	2.04	2.59	1.27	10
14	80	61.56	male	26.6901	26.3496	61.99	65.75	1.06065	36.1	28.3	0.783934	2.44	2.45	1.0041	1.15	1.18	1.02609	1.85746	1.60585	0.864537	3.58	3.48	0.91	1.76541	2.08975	1.18372	2.69	3.12	1.16	1.9289	2.10105	1.08925	10.94	4.85	1.15	11
61	0	62.74	male	30.1064	30.7174	61.28	63.32	1.03329	46.7	46	0.985011	2.43	2.4	0.987654	1.01	1.66	1.64356	1.33381	1.29335	0.969663	1.91	1.94	1.02	1.85603	1.73041	0.932315	2.37	2.7	1.14	3.09513	3.0291	0.978666	5.07	3.52	0.69	12
86	0	68.61	male	27.4506	28.3922	60.65	72.14	1.18945	39.1	46.6	1.19182	2.27	2.15	0.947137	1.66	1.58	0.951807	1.88775	1.59967	0.847398	2.44	1.53	0.63	1.8489	2.10105	1.13638	3.47	2.28	0.66	2.23113	2.77449	1.24353	2.8	2.34	0.84	13
77	0	68.72	male	26.1797	26.805	69.22	81.34	1.17509	29.6	38.7	1.30743	2.29	2.31	1.00873	2.41	2.33	0.966805	2.10429	2.53542	1.20488	1.67	2.13	1.28	1.9816	1.8863	0.951905	2.3	1.85	0.8	1.95583	2.68825	1.37448	1.38	2.43	1.76	14
15	80	64.16	male	27.7941	28.5236	53.29	79.55	1.49278	62.4	64.8	1.03846	2.31	2.29	0.991342	0.92	0.67	0.728261	1.40986	1.90674	1.35243	1.72	2.52	1.47	2.7617	2.5629	0.928016	1.61	3.5	2.17	1.08172	1.13463	1.04891	4.5	8.27	1.84	15
26	80	69.83	male	28.3558	28.2237	58.64	108.72	1.85402	59.4	60.1	1.01178	2.28	2.26	0.991228	1.5	2.12	1.41333	1.74244	1.75862	1.00928	1.42	1.63	1.15	1.40228	1.70265	1.21419	1.71	1.24	0.73	2.02636	1.57522	0.777366	4	3.41	0.85	16
43	0	67.66	male	28.9999	29.6935	73.6	71.56	0.972283	52	65.1	1.25192	2.29	2.1	0.917031	1.16	1.5	1.2931	1.52626	1.24833	0.817902	1.68	1.7	1.01	1.4406	1.71713	1.19196	1.69	1.43	0.85	1.61826	1.36709	0.844791	5.31	3.57	0.67	17
89	40	62.16	male	29.8685	29.3075	54.89	80	1.45746	46.8	45.8	0.978632	2.27	2.29	1.00881	1.33	5.26	3.95489	1.67533	1.14693	0.6846	1.55	2.2	1.42	3.11906	2.49282	0.799221	1.24	1.67	1.35	3.28423	3.46348	1.05458	1.86	3.47	1.87	18
10	40	65.15	male	31.2406	31.6917	62.11	63.62	1.02431	34	30.6	0.9	2.28	2.27	0.995614	0.89	1.35	1.51685	1.90674	1.65736	0.869211	2.44	2.97	1.22	2.50436	2.47751	0.989276	2.44	2.8	1.15	1.2854	1	0.777965	2.97	2.64	0.89	19
32	80	68.7	male	32.8225	33.3446	73.24	112.01	1.52936	40.4	33.6	0.831683	2.38	2.33	0.978992	2.54	1.8	0.708661	1.76269	2.18018	1.23685	1.55	2.95	1.9	2.26751	2.01081	0.886791	1	2.19	2.19	2.87233	3.77259	1.31342	3.29	8.06	2.45	20
87	80	63.52	male	27.8685	27.8227	60.75	109.05	1.79506	22.6	25.8	1.14159	2.45	2.32	0.946939	0.72	0.8	1.11111	1.69219	1.95583	1.1558	1.46	3.28	2.25	1.25605	1.17645	0.936633	1.03	3	2.91	3.04547	3.43956	1.1294	1	2.22	2.22	21
8	80	73.3	male	34.1525	34.3506	44.43	75.25	1.69368	46.8	45.5	0.972222	2.3	2.27	0.986957	1.66	1.5	0.903614	1.95432	2.7532	1.40878	3.12	3.36	1.08	3.16017	2.22085	0.702763	2.84	3.63	1.28	1.41204	1.75186	1.24066	5.65	5.84	1.03	22
38	0	60.57	male	27.8204	28.8	70.77	56.66	0.800622	31.7	37.3	1.17666	2.26	2.08	0.920354	2.05	1.55	0.756098	2.09459	1.61826	0.772592	4.01	2.73	0.68	2.30271	2.27276	0.986993	5.93	3.44	0.58	2.8635	2.89231	1.01006	5.99	6.63	1.11	23
65	0	73.99	male	34.4022	33.7868	59.87	60.83	1.01603	51.3	60.5	1.17934	2.17	2.2	1.01382	1.9	2.43	1.27895	1.48681	1.4012	0.942422	1.94	2.11	1.09	1.65354	1.46071	0.883383	2.69	5.3	1.97	3.49833	4.03093	1.15224	7.78	9.92	1.28	24
112	40	75.22	female	27.4102	27.7767	64.38	119.77	1.86036	41.9	34.7	0.828162	2.29	2.32	1.0131	4.2	3.83	0.911905	1.96337	2.29386	1.16833				1.56555	2.02948	1.29634				2.77877	3.35324	1.20674				25
4	80	63.18	male	25.0553	26.413	60.92	89.62	1.47111	38	39.5	1.03947	2.48	2.35	0.947581	1.32	1.21	0.916667	3.14075	3.30962	1.05377				2.03418	2.50244	1.2302				1.78454	1.66761	0.934471				26
9	40	63.14	male	26.1896	25.6902	60.08	82.4	1.3715	32	30	0.9375	2.26	2.23	0.986726	0.63	1.28	2.03175	2.25532	3.11906	1.38298	2.19	3.67	1.68	2.08975	1.82064	0.871221	1.66	4.08	2.46	1.42186	1.88194	1.32358	6.54	7.3	1.12	27
98	80	61.88	male	32.7333	34.1058	58.27	110.24	1.89188	39.2	33.3	0.84949	2.31	2.33	1.00866	1.5	1.19	0.793333	2.35653	1.95583	0.829959	2.54	2.36	0.93	1.79005	2.19534	1.22641	2	2.24	1.12	3.26657	3.30707	1.0124	6.92	8.58	1.24	28
84	0	72.51	female	33.1345	32.9372	48.47	62.42	1.28781	44.8	50	1.11607	2.36	2.35	0.995763	0.99	0.89	0.89899	2.3711	1.81504	0.765484				2.39865	2.1785	0.908218				3.43426	2.95081	0.859227				29
1	40	66.23	male	25.3006	25.6474	49.45	74.81	1.51284	47.2	41.4	0.877119	2.37	2.36	0.995781	1.58	1.58	1	1.86607	2.9874	1.60091	4.22	5.19	1.23	1.93634	2.90571	1.50062	1.67	3.32	1.99	1.46183	2.34567	1.60461	7.35	8.32	1.13	30
11	0	75.75	male	25.6416	26.2066	72.35	69.43	0.959641	42.6	39	0.915493	2.2	2.3	1.04545	1.23	0.91	0.739837	2.91467	2.0962	0.71919	1.84	2.49	1.35	2.24492	2.18018	0.971158	1.2	1.91	1.59	1.52744	2.30094	1.50641	3.31	3.35	1.01	31
66	80	60.56	male	37.1867	36.4533	57.94	117.91	2.03504	47.4	38.4	0.810127	2.21	2.21	1	1.32	1.71	1.29545	1.77222	1.77222	1	1.13	1.03	0.91	2.0499	2.61877	1.27751	1.95	1.51	0.77	3.07375	3.21169	1.04488	4.64	3.81	0.82	32
12	40	85.75	male	28.1117	28.4982	64.14	77.97	1.21562	32.1	29.7	0.925234	2.29	2.21	0.965066	1.64	1.3	0.792683	3.03143	2.65124	0.874583				3.53898	3.93583	1.11214				2.35835	2.49282	1.05702				33
35	40	66.28	male	25.993	25.8345	68.87	69.49	1.009	43.2	40.3	0.93287	2.39	2.27	0.949791	10.1	10.1	1	2.0962	2.54716	1.21513	1.73	1.85	1.07	1.50293	1.73174	1.15224	1.89	2.02	1.07	2.16678	2.80889	1.29634	3.92	5.25	1.34	34
94	80	70.1	female	29.5144	28.7233	68.45	155.69	2.27451	43.5	35.8	0.822989	2.36	2.23	0.944915	1.3	0.91	0.7	2.18859	2.62887	1.20117				1.39797	2.56883	1.83754				2.36381	2.14685	0.908218				35
24	40	67.34	male	29.2677	30.0116	65.22	99.75	1.52944	32.8	29	0.884146	2.33	2.28	0.978541	1.44	2.13	1.47917	1.88339	1.80111	0.956314				1.73708	2.51209	1.44616				2.13531	2.32409	1.08841				36
79	80	67.67	male	26.9388	27.1837	59.7	110.75	1.85511	48.5	40.3	0.830928	2.41	2.31	0.958506	7.35	8.59	1.16871	3.7755	3.15287	0.835088	3.79	5.05	1.33	1.59475	1.33793	0.838956	1.97	1.89	0.96	2.52178	2.30982	0.915945	3.49	3.66	1.05	37
81	0	79.18	male	29.8524	29.6651	63.36	81.13	1.28046	33.5	36.7	1.09552	2.37	2.35	0.991561	2.38	1.9	0.798319	2.79164	1.60337	0.574349	2.39	1.58	0.66	1.71845	2.12056	1.23399	2.6	1.68	0.65	3.23154	3.33008	1.03049	2.58	1.49	0.58	38
27	40	61.23	male	29.9978	29.725	52.61	62.48	1.18761	57.6	47.7	0.828125	2.4	2.33	0.970833	1.34	2.01	1.5	1	1.67662	1.67662	3.45	3.2	0.93	1	1.8863	1.8863	2.49	2.75	1.1	2.90347	3.61334	1.24449	19.23	8.18	0.43	39
96	40	72.4	female	24.7461	24.8047	58.62	95.05	1.62146	47.9	68.8	1.43633	2.36	2.31	0.978814	0.88	0.75	0.852273	2.45472	2.01391	0.820426				2.07852	2.19872	1.05783				1.56193	1.9289	1.23494				40
74	40	62.7	male	31.0694	31.3143	62.96	72.4	1.14994	35.4	43.9	1.24011	2.21	2.22	1.00452	1.8	2.17	1.20556	2.43026	1.52861	0.628991				2.10105	2.26926	1.08006				2.78091	3.51453	1.26381				41
110	80	72.42	female	25.1953	25.6641	68.59	135.65	1.97769	40.9	45.8	1.1198	2.29	2.16	0.943231	1.5	1.52	1.01333	1.50525	1.6948	1.12593				1.49485	1.74647	1.16833				2.20042	2.73629	1.24353				42
22	40	62.72	male	32.2011	32.3423	57.67	70.09	1.21536	59.5	49.8	0.836975	2.28	2.32	1.01754	0.92	0.64	0.695652	1.78454	1.95583	1.09598				2.20721	2.35835	1.06848				2.10916	2.23802	1.0611				43
71	0	66.39	male	32.2562	32.5647	41.5	41.23	0.993494	69.3	66	0.952381	2.27	2.28	1.00441	0.96	0.82	0.854167	2.10429	3.15773	1.50062	3.45	4.4	1.28	1.70133	1.40986	0.828681	1.58	4.12	2.61	2.65942	3.35582	1.26186	6.55	8.46	1.29	44
75	80	70.53	male	29.0132	29.5321	57.77	106.46	1.84282	39.9	32.1	0.804511	2.31	2.4	1.03896	0.93	0.8	0.860215	1.87615	2.07532	1.10616	1.91	1.39	0.73	1.63706	1.35974	0.830598	3.11	1.17	0.38	2.08333	2.09136	1.00386	2.15	2.74	1.27	45
28	40	64.85	male	31.6535	31.7895	69.97	92.84	1.32685	39.5	44.5	1.12658	2.24	2.11	0.941964	1.54	0.74	0.480519	2.27276	1.59721	0.702763	1.93	4.43	2.3	2.60469	1.84748	0.709288	1.34	3.81	2.84	1.96186	1.57644	0.803542	2.19	8.91	4.07	46
41	80	62.55	male	28.3518	29.446	53.35	80.71	1.51284	50.1	38.5	0.768463	2.42	2.38	0.983471	1.19	1.27	1.06723	1.42625	1.03926	0.728668				1.49715	1.42625	0.952638				3.5801	2.05623	0.574349				47
7	80	61.47	male	31.0771	31.4608	35.92	69.92	1.94655	67.3	57.4	0.852897	2.38	2.33	0.978992	1.46	1.47	1.00685	3.63287	3.26909	0.899863	3.67	1.66	0.45	3.69211	3.96015	1.0726	2.77	2.14	0.77	2.70486	2.27626	0.841544	13.53	4.73	0.35	48
88	40	66.34	male	27.3338	27.9912	55.37	90.96	1.64277	24.6	26.2	1.06504	2.39	2.31	0.966527	0.87	0.95	1.09195	2.20551	1.44838	0.656712	1.59	1.66	1.04	2.23113	1.50989	0.676737	2.28	2.32	1.02	3.85186	2.77449	0.720298	2.56	3.58	1.4	49
68	0	77.12	male	34.626	34.8996	63.97	65.15	1.01845	47.1	52	1.10403	2.32	2.34	1.00862	1.07	1.06	0.990654	1.5728	2.02012	1.28441	1.42	3.66	2.58	1.67018	1.55953	0.933752	2.59	4.68	1.81	2.39127	3.18705	1.33279	4.3	4.06	0.94	50
109	0	66.36	female	31.9559	31.0009	48.65	52.06	1.07009	112	89.9	0.802679	2.39	2.36	0.987448	2.06	0.77	0.373786	1.05865	1.00309	0.947516				1.26771	1.31444	1.03686				3.29436	3.71207	1.12679				51
107	40	63.57	male	26.6204	26.5895	60.83	102.92	1.69193	39.4	32.5	0.824873	2.24	2.2	0.982143	1.4	1.16	0.828571	3.19935	2.78519	0.870551	5.96	1.75	0.29	2.52762	2.33665	0.92445	8.79	1.87	0.21	1.96186	2.30094	1.17283	8.5	3	0.35	52
111	0	63.63	female	26.1757	26.1564	62.72	89.58	1.42825	27	31.6	1.17037	2.52	2.38	0.944444	0.95	0.52	0.547368	2.5452	1.98008	0.777965				2.70278	1.90821	0.706018				2.79379	1.85318	0.66332				53
5	0	69.44	male	28.91	29.6886	50.6	46.67	0.922332	43.7	54.1	1.23799	2.3	2.2	0.956522	1.44	1.55	1.07639	3.19196	2.992	0.937354	2.9	4.39	1.51	1.80389	1.8546	1.02811	2.49	4.31	1.73	2.19196	2.06894	0.943874	7.75	8.33	1.07	54
70	40	68.69	male	31.0857	31.2653	66.93	70.19	1.04871	49.6	55.3	1.11492	2.31	2.23	0.965368	1.84	1.33	0.722826	2.49282	2.2277	0.893648				1.82485	2.10753	1.15491				2.69862	3.10229	1.14958				55
92	40	63.75	male	26.466	27.3457	54.75	107.56	1.96457	44.6	49.4	1.10762	2.33	2.35	1.00858	2.85	1.59	0.557895	2.96448	2.78949	0.940971				1.80389	2.13366	1.18281				2.30094	1.95131	0.848051				56
59	40	61.43	male	27.1708	27.4454	61.83	71.62	1.15834	40.4	45.7	1.13119	2.34	2.23	0.952991	0.6	1.31	2.18333	1.80528	2.07852	1.15136	2.37	1.08	0.46	1.01084	1.39689	1.38191	3.99	1.39	0.35	4.24766	4.76783	1.12246	3.43	3.51	1.02	57
31	0	60.27	male	32.3894	32.7347	64.23	56.63	0.881675	26.5	35.5	1.33962	2.3	2.28	0.991304	1.02	0.82	0.803922	1.95733	1.75456	0.896405	3.11	4.1	1.32	1.83048	1.77495	0.969663	1.36	3.17	2.33	4.41782	2.75532	0.623685	7.71	18.77	2.43	58
106	80	64.46	male	25.991	26.8274	64.12	128.48	2.00374	25	22.5	0.9	2.42	2.37	0.979339	1.07	0.93	0.869159	3.6978	3.73501	1.01006	3.19	2.39	0.75	2.21402	1.5813	0.714222	2.77	2.34	0.84	1.6792	1.51805	0.904031	3.75	2.71	0.72	59
105	80	64.5	male	32.1143	32.1143	48.1	101.5	2.11019	36.4	35.1	0.964286	2.37	2.37	1	0.47	0.64	1.3617	3.0291	3.47417	1.14693				2.3223	2.27101	0.977913				2.07532	3.74365	1.80389				60
80	40	61.63	male	29.3981	29.5062	44.3	84.61	1.90993	39.1	35.2	0.900256	2.26	2.31	1.02212	3.93	2.5	0.636132	2.21743	1.55833	0.702763				1.66889	1.67404	1.00309				2.01857	2.72788	1.35139				61
108	40	61.62	female	30.8334	30.6357	40.2	85.98	2.13881	42.6	28	0.657277	2.34	2.24	0.957265	1.33	0.86	0.646617	3.08323	2.67998	0.869211				1.99231	2.10267	1.05539				1.98008	1.98618	1.00309				62
2	0	63.71	male	32.8076	31.1492	60.06	54.65	0.909923	26.2	37.3	1.42366	2.46	2.45	0.995935	1.1	0.88	0.8	2.34026	2.51016	1.0726				1.2283	1.32052	1.07508				1.85032	1.41639	0.765484				63
13	0	61.52	male	31.1837	33.6	65.09	38.86	0.59702	38.3	58.4	1.5248	2.38	2.19	0.920168	2.1	1.28	0.609524	1.14428	1.54756	1.35243	3.11	3.85	1.24	1.79973	1.99538	1.10872	2.99	2.9	0.97	1.46634	1.56675	1.06848	5.8	10.57	1.82	64
52	80	75.31	male	28.8332	28.2078	66.33	63.3	0.954319	37	46.4	1.25405	2.36	2.38	1.00847	0.85	1.68	1.97647	2.08493	2.10429	1.00928				2.03261	2.35653	1.15936				2.4079	2.08172	0.864537				65
6	0	60.77	male	32.9143	32.1306	57.69	27.48	0.476339	49	52.1	1.06327	2.46	2.28	0.926829	0.96	1.27	1.32292	2.51596	4.88303	1.94082	4.96	4.91	0.99	1.75051	2.2363	1.27751	4.07	3.6	0.88	2.06894	2.15182	1.04006	7.06	5.9	0.84	66
95	40	71.84	female	27.9038	28.6846	61.67	115.58	1.87417	31.4	38.6	1.2293	2.31	2.15	0.930736	1.83	1.23	0.672131	1.75051	1.1984	0.6846				1.74244	1.40878	0.808508				1.56073	1.97551	1.26576				67
16	80	70.92	male	32.3192	31.7984	54.34	123.28	2.26868	44.4	48.6	1.09459	2.2	2.24	1.01818	0.87	1.01	1.16092	2.5629	1.88484	0.735433				1.66376	1.67146	1.00463				1.82626	1.68828	0.92445				68
53	80	63.31	male	31.9503	32.4763	36.9	88.99	2.41165	57.1	46.3	0.810858	2.36	2.37	1.00424	0.92	1.19	1.29348	1.88049	1.57401	0.83702	3.47	1.76	0.51	1.93783	1.25798	0.649169	5.66	1.76	0.31	1.97095	1.83471	0.93088	4.46	3.47	0.78	69
55	0	68.94	male	28.8391	28.488	46.56	32.46	0.697165	41.4	48.6	1.17391	2.36	2.3	0.974576	1.74	1.35	0.775862	1.85175	2.46608	1.33176				1.65354	1.80528	1.09177				1.70527	3.27918	1.92297				70
113	80	64.13	female	27.1933	27.8896	42.32	117.96	2.78733	55.7	47.8	0.858169	2.3	2.13	0.926087	0.5	0.85	1.7	3.47417	1.94381	0.559505				4.14106	2.1271	0.513661				2.7153	1.76541	0.65017				71
* Placebo controls were allowed to take up to 20 µg vitamin D3/day
